# Supplementary material for: Electro-Mineralization of Aqueous Phenazopyridine Using Platinum Nanoparticles Deposited onto Multiwalled Carbon Nanotubes
Source: MDPI journal article supplement (doi:10.3390/pr12081625), 2024-08-02
Supplement: s1 [file s1]

Supplementary materials for  
Electro-mineralization of aqueous phenazopyridine using  
platinum nanoparticles deposited onto multiwalled carbon  
nanotubes

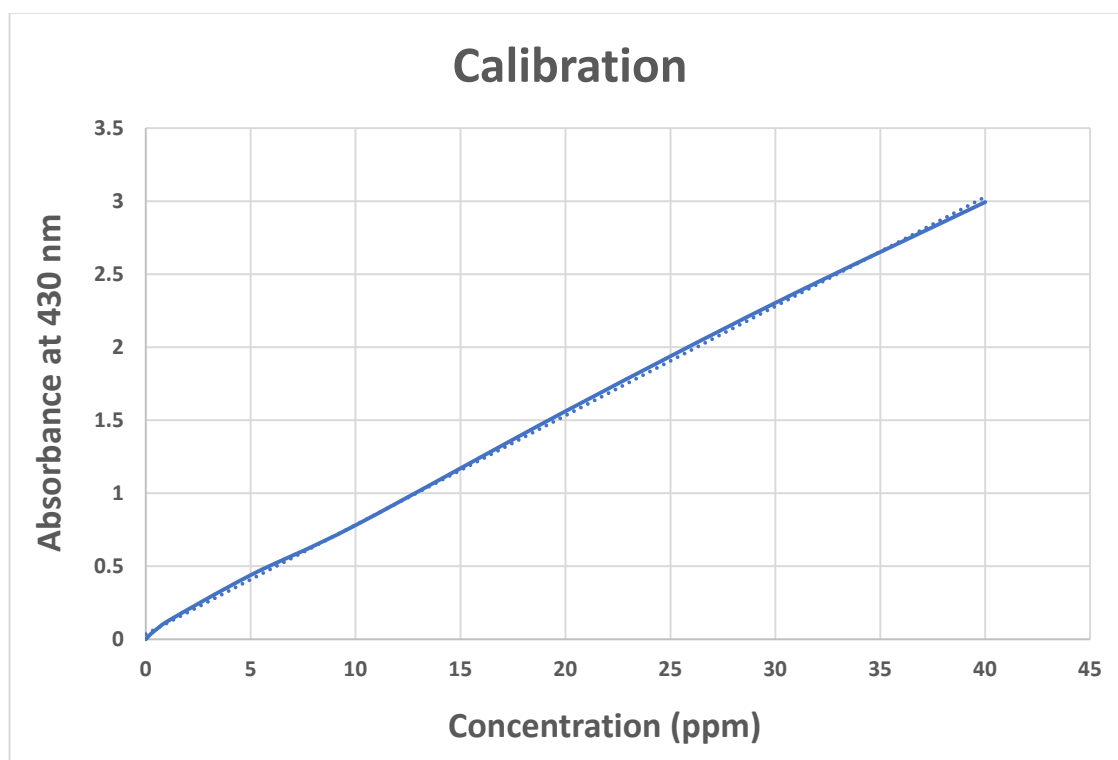

Figure S1: Calibration curves phenazopyridine determination.

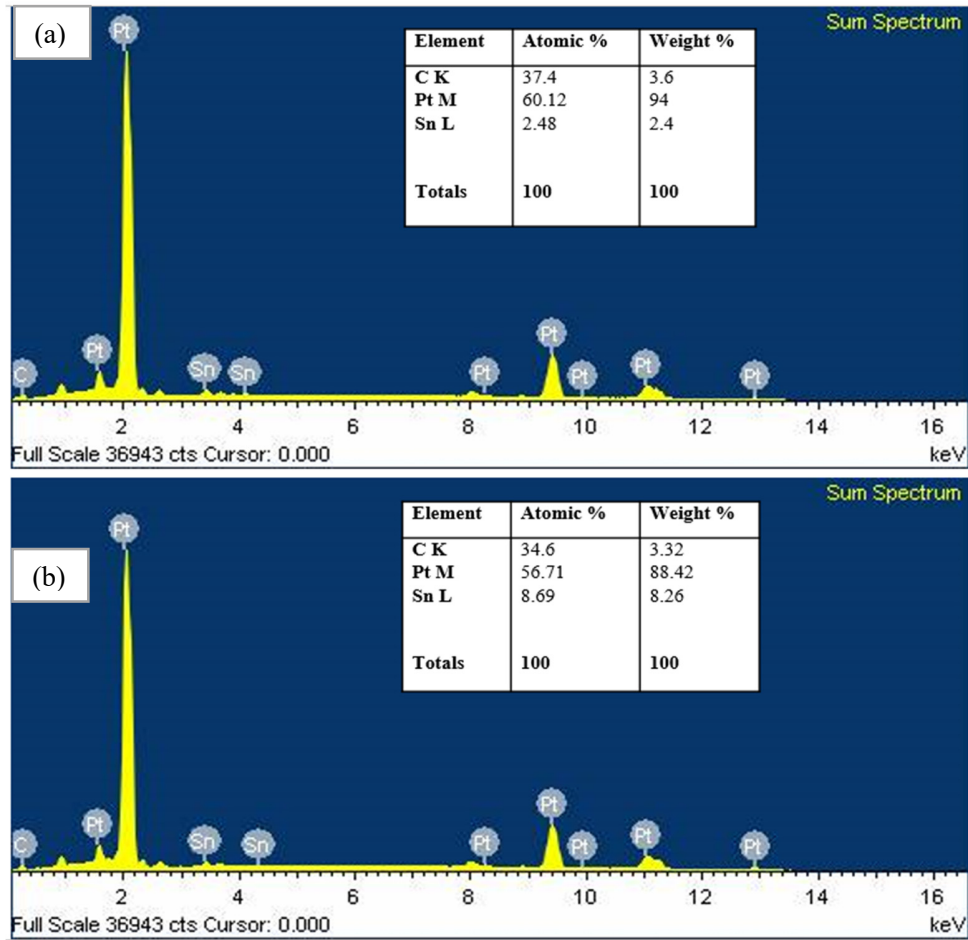

Figure S2: EDS spectral results measured at the surfaces of fresh (a) and used (b) PtNP@MWCNT-FTO-E electrodes. Error is 15%.

### *The integrated rate law calculations:*

In the integrated rate law method, has been checked for possible zero order, first order and second order behaviours, using the relations shown in Equations (4.1)-(4.3)

$$\text{Zero order reaction: } [C]/t = -kt + [C]_o \quad (4.1)$$

$$\text{First order reaction: } \ln[C]/t = -kt + \ln[C]_o \quad (4.2)$$

$$\text{Second order reaction: } 1/[C]/t = kt + 1/[C]_o \quad (4.3),$$

where  $[C]_o$  is the initial phenazopyridine molar concentration,  $[C]_t$  is

phenazopyridine molar concentration at time  $t$  (min) and  $k$  is the rate constant.

Supplementary Figures S2(a, b and c) summarize plots based on all equations.

**(a)**

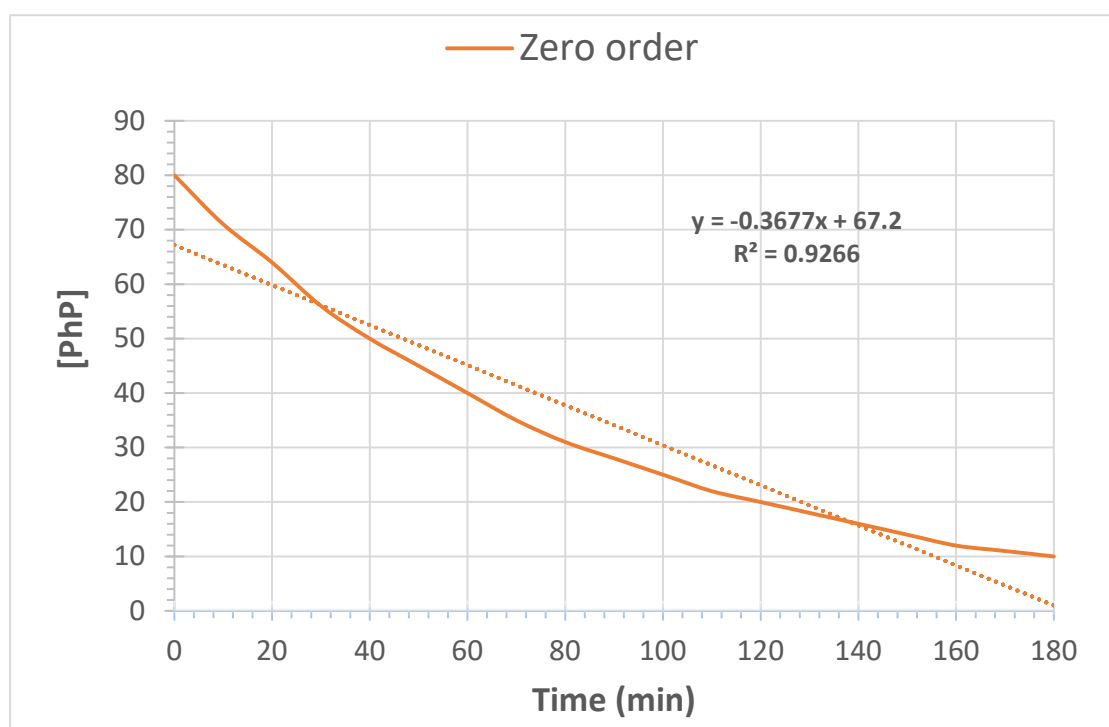

**(b)**

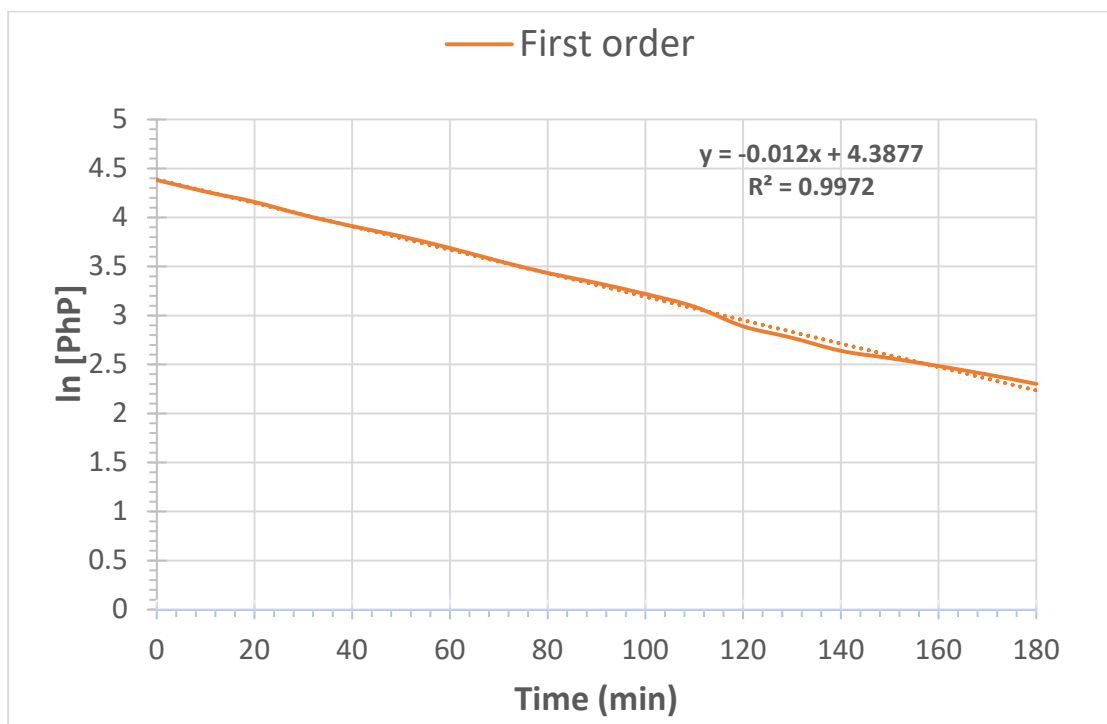

(c)

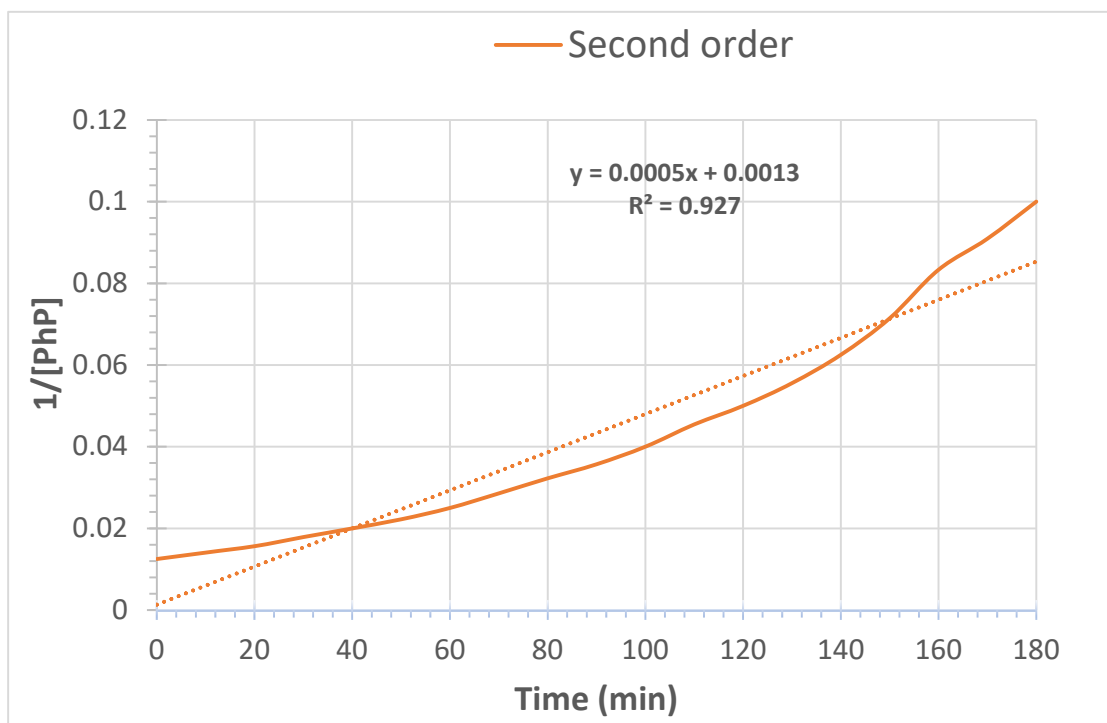

Figure S3: Plots describing the kinetics of phenazopyridine electrooxidation on PtNP@MWCNT/FTO-E electrode. (a) zero-order, (b) first-order and (c) e second-order.

Experiment is conducted using phenazopyridine solution (70 mL, 80 ppm), at +1.60 V (vs. SCE) at room temperature for 3 h. Interelectrode spacing is 1.2 cm.

### ***The initial rate law calculations:***

The reaction order with respect to phenazopyridine has been calculated using the initial rate method [45][46, 47]. Three electrooxidation experiments with various phenazopyridine initial concentrations (40 ppm, 80 ppm and 120 ppm) has been conducted. The general formula of the reaction order is given in equation (4.4).

$$\ln(\text{initial Rate}) = \ln k + n \ln[C]_0 \quad (4.4)$$

Where  $n$  is the order of the reaction. From the plot of  $\ln \text{Rate}_{\text{initial}}$  vs.  $\ln [C]_0$  (Figure 4.20), the order of the reaction with respect to phenazopyridine is (0.69) while the rate constant  $k$  is  $8.35 \times 10^{-2} \text{ min}^{-1}$ . Literature also showed that, the electrooxidation and photodegradation of other toxic dyes obeys the pseudo first order [48-52]. Values of ( $n < 1$ ) reveals that phenazopyridine is adsorbed at the electrode surface and oxidized, while co-adsorption of other species may also occur [50, 53, 54].

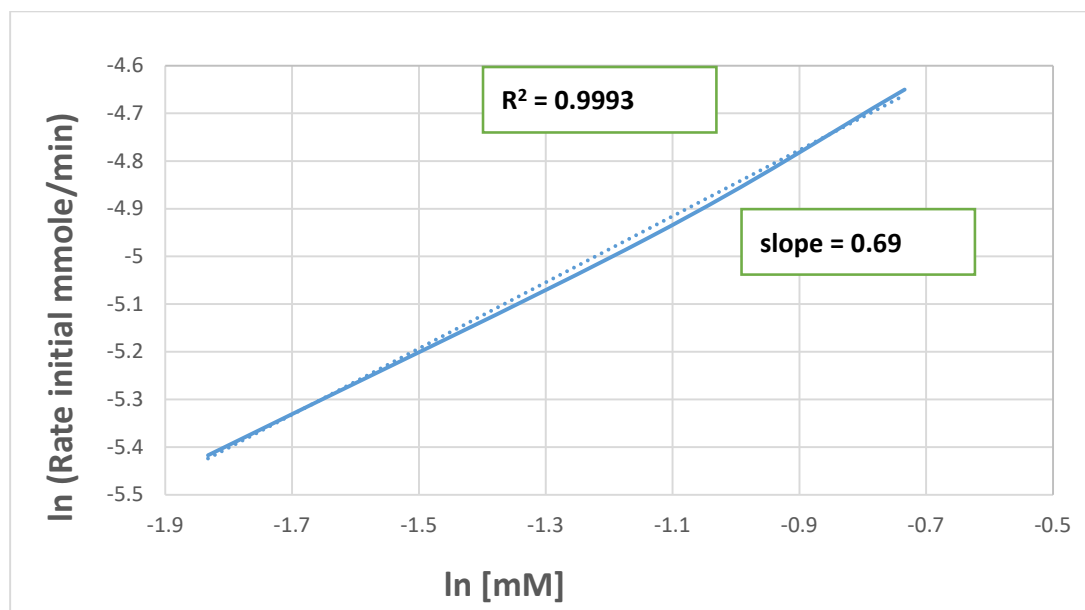

Figure S4: Plot of  $\ln (\text{Rate}_{\text{initial}})$  vs.  $\ln(\text{mM})$  for phenazopyridine electrooxidation on PtNP@MWCNT/FTO-E electrode. Experiments are conducted using 70 mL solutions of varying contaminant concentrations, at +1.60 V (vs. SCE), room temperature and intrinsic pH for 2 h. Interelectrode spacing is 1.2 cm.
